# Supplementary material
Source: PubMed Central journal article supplement (PMC8041233)
Supplement: NIHMS1650918-supplement-1.pdf [file NIHMS1650918-supplement-1.pdf]

# A genetic mouse model recapitulates immune checkpoint inhibitor-associated myocarditis and supports a mechanism-based therapeutic intervention

Spencer C. Wei<sup>1\*</sup>, Wouter C. Meijers<sup>2\*</sup>, Margaret L. Axelrod<sup>2</sup>, Nana-Ama A.S. Anang<sup>1</sup>, Elles M. Screever<sup>2</sup>, Elizabeth Brunner Wescott<sup>4</sup>, Douglas B. Johnson<sup>2</sup>, Elizabeth M. Whitley<sup>3</sup>, Lorenz Lehmann<sup>6</sup>, Pierre-Yves Courand<sup>7</sup>, James J. Mancuso<sup>1</sup>, Lauren E. Himmel<sup>4</sup>, Benedicte Lebrun-Vignes<sup>13</sup>, Matthew J. Wleklinski<sup>2</sup>, Bjorn C. Knollmann<sup>2</sup>, Jayashree Srinivasan<sup>5</sup>, Yu Li<sup>5</sup>, Oluwatomisin T. Atolagbe<sup>1</sup>, Xiayu Rao<sup>8</sup>, Yang Zhao<sup>8</sup>, Jing Wang<sup>8</sup>, Lauren Ehrlich<sup>5,9</sup>, Padmanee Sharma<sup>10,11</sup>, Joe-Elie Salem<sup>2,12</sup>, Justin M. Balko<sup>2,4</sup>, Javid J. Moslehi<sup>2, #</sup>, and James P. Allison<sup>1, 11, #</sup>

## Supplemental Material

2 tables

10 figures

## Supplemental Tables:

|                                                       | <i>Ctla4<sup>+/-</sup> Pdcd1<sup>-/-</sup> mice</i> |        | <i>Ctla4<sup>+/+</sup> Pdcd1<sup>-/-</sup> mice</i> |        |
|-------------------------------------------------------|-----------------------------------------------------|--------|-----------------------------------------------------|--------|
| <b>Heart</b>                                          |                                                     |        |                                                     |        |
| <i>Number of mice evaluated</i>                       | 54                                                  |        | 59                                                  |        |
| <i>Percentage male</i>                                | 48%                                                 |        | 56%                                                 |        |
| <i>Percentage female</i>                              | 52%                                                 |        | 44%                                                 |        |
| <i>Mean age evaluated</i>                             | 154.5 days                                          |        | 164.4 days                                          |        |
|                                                       | Male                                                | Female | Male                                                | Female |
| <i>Percentage of mice with lymphocytic infiltrate</i> | 23%                                                 | 39%    | 0.09%                                               | 19%    |
| <i>Mean lymphocytic infiltrate histology score</i>    | 2.46                                                | 3.71   | 0.76                                                | 1.23   |
| <i>Percentage of mice with T cell infiltrate</i>      | 34.6%                                               | 42.9%  | 15.2%                                               | 19.2%  |
| <i>Mean T cell infiltrate score</i>                   | 3.04                                                | 5.73   | 1.59                                                | 2.36   |
|                                                       |                                                     |        |                                                     |        |
| <b>Pancreas</b>                                       |                                                     |        |                                                     |        |
| <i>Number of mice evaluated</i>                       | 44                                                  |        | 42                                                  |        |
| <i>Percentage male</i>                                | 48%                                                 |        | 45%                                                 |        |
| <i>Percentage female</i>                              | 52%                                                 |        | 55%                                                 |        |
| <i>Mean age evaluated</i>                             | 139.6 days                                          |        | 149.4 days                                          |        |
|                                                       | Male                                                | Female | Male                                                | Female |
| <i>Percentage of mice with lymphocytic infiltrate</i> | 71%                                                 | 87%    | 11%                                                 | 30%    |
| <i>Mean lymphocytic infiltrate histology score</i>    | 4.43                                                | 5.13   | 0.68                                                | 1.13   |
| <i>Percentage of mice with T cell infiltrate</i>      | 62%                                                 | 77%    | 39%                                                 | 43%    |
| <i>Mean T cell infiltrate score</i>                   | 3.15                                                | 3.27   | 1.22                                                | 1.52   |
|                                                       |                                                     |        |                                                     |        |
| <i>Percentage of mice with exocrine atrophy</i>       | 43%                                                 | 57%    | 5%                                                  | 0%     |

## Supplemental Table 1. Histological analyses of heart and pancreatic tissues of *Ctla4<sup>+/-</sup> Pdcd1<sup>-/-</sup>* mice and *Ctla4<sup>+/-</sup> Pdcd1<sup>-/-</sup>* mice.

Semi-quantitative histologic scores of heart and pancreatic tissues. Mouse characteristics including age, sex, and genotype are denoted. Lymphocytic infiltration was defined by a histologic score of greater or equal to 2 of H&E stained tissue section (see Methods). T cell infiltrate was defined by a histologic score of greater or equal to 2 for CD3 IHC stained tissue sections.

| Demog         | Cancer Medical History                                                                                                                                                                       | ICI regimen; number of doses received                     | Time to onset myocarditis; concurrent irAE                              | Myocarditis presentation                                                                                                                                                                                                                                                                                                          | Immuno-modulators and other support (treatment sequence)                                                                                                                                                                                                                                           | Outcome                                                                                                                                                                                                                                                                                                                                                        |
|---------------|----------------------------------------------------------------------------------------------------------------------------------------------------------------------------------------------|-----------------------------------------------------------|-------------------------------------------------------------------------|-----------------------------------------------------------------------------------------------------------------------------------------------------------------------------------------------------------------------------------------------------------------------------------------------------------------------------------|----------------------------------------------------------------------------------------------------------------------------------------------------------------------------------------------------------------------------------------------------------------------------------------------------|----------------------------------------------------------------------------------------------------------------------------------------------------------------------------------------------------------------------------------------------------------------------------------------------------------------------------------------------------------------|
| 66y, F, 50kg  | - Treated for metastatic lung cancer (1 <sup>st</sup> line: carboplatin, pemetrexed)<br>- Past history of thymoma (surgery and chest Rx 20 years earlier) complicated paralysis of diaphragm | 2 <sup>nd</sup> line: Nivolumab (240 mg/2 weeks); 3 doses | 37 days; myositis, hepatitis, arthritis (flare), myasthenia gravis like | Pseudo-ST+ (cMRI +, normal cAngio);<br>Max Trop-T: 6.2 <sub>ng/ml</sub> ; Max NTpro-BNP: 6.8 <sub>ng/ml</sub> ; Min LVEF (55%); PVC (10-14,000/day with triplets); compatible ICI-irAE peripheral muscle biopsy                                                                                                                   | 1/ Corticoreistant (3 days of 500mg IV MP)<br>2/Plasmapheresis resistant (5 sessions)<br>3/ Abatacept (500mg IV/2weeks, 5 doses) plus steroids (1mg/kg/day PO prednisone with 5mg/2weeks tapering)                                                                                                 | - Progressive normalization of biomarkers of myositis, hepatitis, myocarditis<br>- Complete resolution of PVCs, LVEF remained normal<br>- Discharge home at 1.5 month (stable cancer disease)<br>- Died home at 3.5 months (care refusal, respiratory distress: pulmonary infection and embolism)                                                              |
| 71y, M, 70 kg | - Treated for metastatic prostate cancer (previous lines: docetaxel, abiraterone and bone Rx)                                                                                                | Pembrolizumab (200 mg/3 weeks); 2 doses                   | 33 days; myositis; hepatitis; arthritis, myasthenia gravis like         | Initial myositis presentation complicated after one week by a complete atrio-ventricular block (cAngio with no significant coronary artery stenosis); Max Trop-I: 1.7 <sub>ng/ml</sub> ; Max NTproBNP 0.83 <sub>ng/ml</sub> ; Min LVEF (60%); non-sustained ventricular tachycardia; compatible ICI-irAE peripheral muscle biopsy | 1/ Oral prednisone 1mg/kg/day during 1 week for myositis treatment<br>2/ 3 days of 1000mg IV MP when myocarditis was suspected (complete atrio-ventricular block)<br>3/ Abatacept 500 mg IV / 2weeks, 3 doses) plus steroids (1 mg/kg/day PO prednisone) with a progressive tapering over 3 months | - Progressive normalization of Trop-I at 3 weeks with a major decreased 24 hours after the first abatacept dose of (0.4 <sub>ng/ml</sub> )<br>- complete resolution of ventricular arrhythmia after abatacept<br>- LVEF remained normal<br>- Hospital discharge at day 43<br>- Alive with stable cancer disease at 4 months, tentative new line (enzalutamide) |
| 68y, F, 63kg  | - Treated for thymus carcinoma (previous lines: carboplatine, paclitaxel)<br>- Past history of breast cancer (surgery and radiation 28 and 9 years ago)                                      | Pembrolizumab (200mg/3 weeks); 1 dose                     | 21 days; Myositis; Myasthenia gravis like syndrome                      | Primarily muscle pain, diplopia, fatigue. Then dyspnea (NYHA II-III).<br>InitialTnT: 0.52 ng/ml, max. 3.7 ng/ml. Max. NT-proBNP: 5.6 ng/ml, CK: 6288 U/l. ST-elevations in I,II,III, aVF, V4-V6. Min. LVEF 45%, cMRI+, biopsy +                                                                                                   | 1000mg prednisone i.v. for 1 day, 500mg for 2 days, 250mg for 3 days; IgG immonoglobulines (2x, day 5-6), plasmapheresis (5x, day 8-12),<br>Abatacept 500mg (5x, every 2 weeks, beginning day 13) with steroid tapering                                                                            | - Progressive normalization of biomarkers of myositis and myocarditis after Abatacept treatment<br>-LVEF normalization<br>-Tracheotomy with long term ventilation for 2 month<br>- Covered LV rupture, after 3 month<br>- Alive with stable cancer disease 6 month after initial myocarditis                                                                   |

**Supplemental Table 2. Case series of patients with ICI-associated myocarditis treated with abatacept**

# Supplemental Figure 1

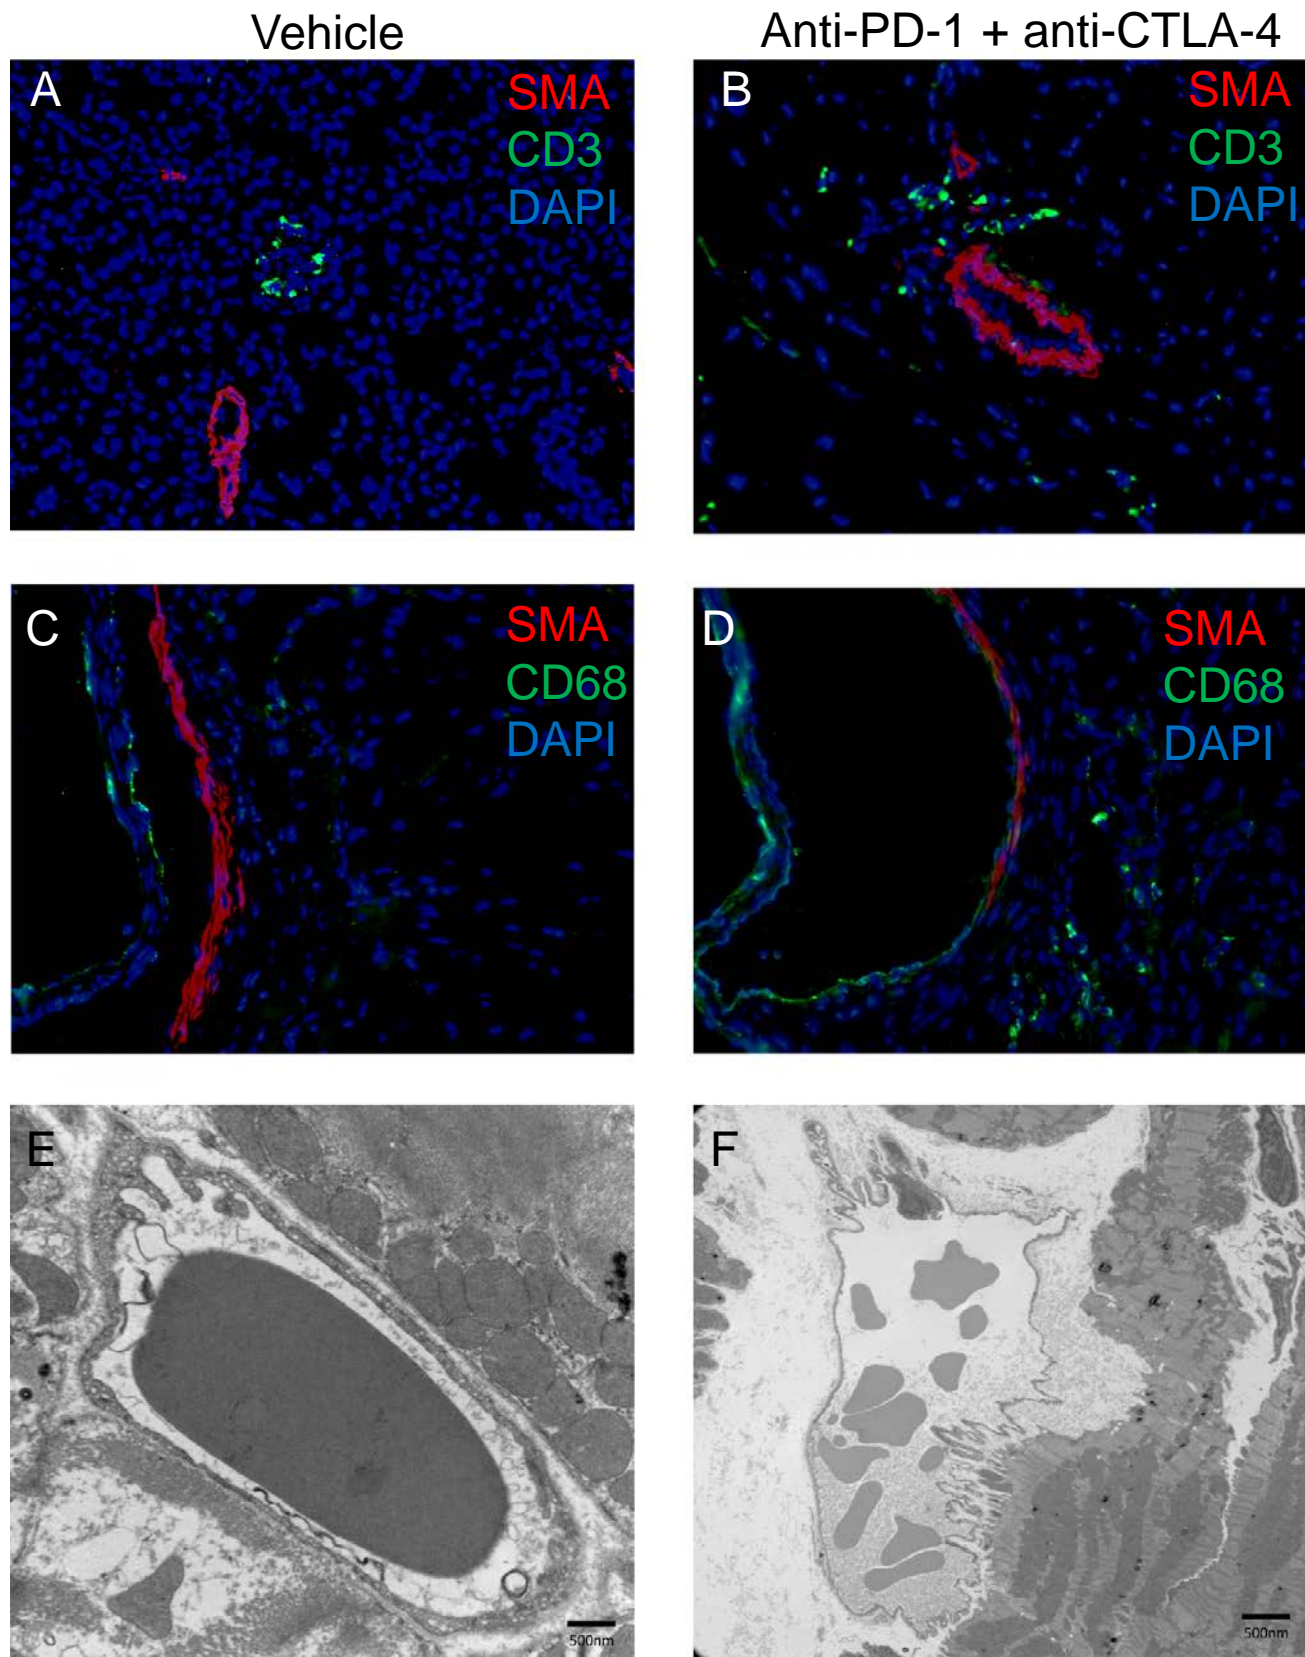

**Supplemental Figure 1: Pharmacological inhibition of CTLA-4 and PD-1 leads to increased cardiac immune infiltration in MRL-*Fas*<sup>lpr</sup> mice.**

**A-D)** Immunofluorescent staining of cardiac tissue from MRL-*Fas*<sup>lpr</sup> mice treated with vehicle or checkpoint blockade therapy.

**E-F)** Electron microscopy (EM) images of cardiac tissue from MRL-*Fas*<sup>lpr</sup> mice treated with vehicle or checkpoint blockade therapy.

# Supplemental Figure 2

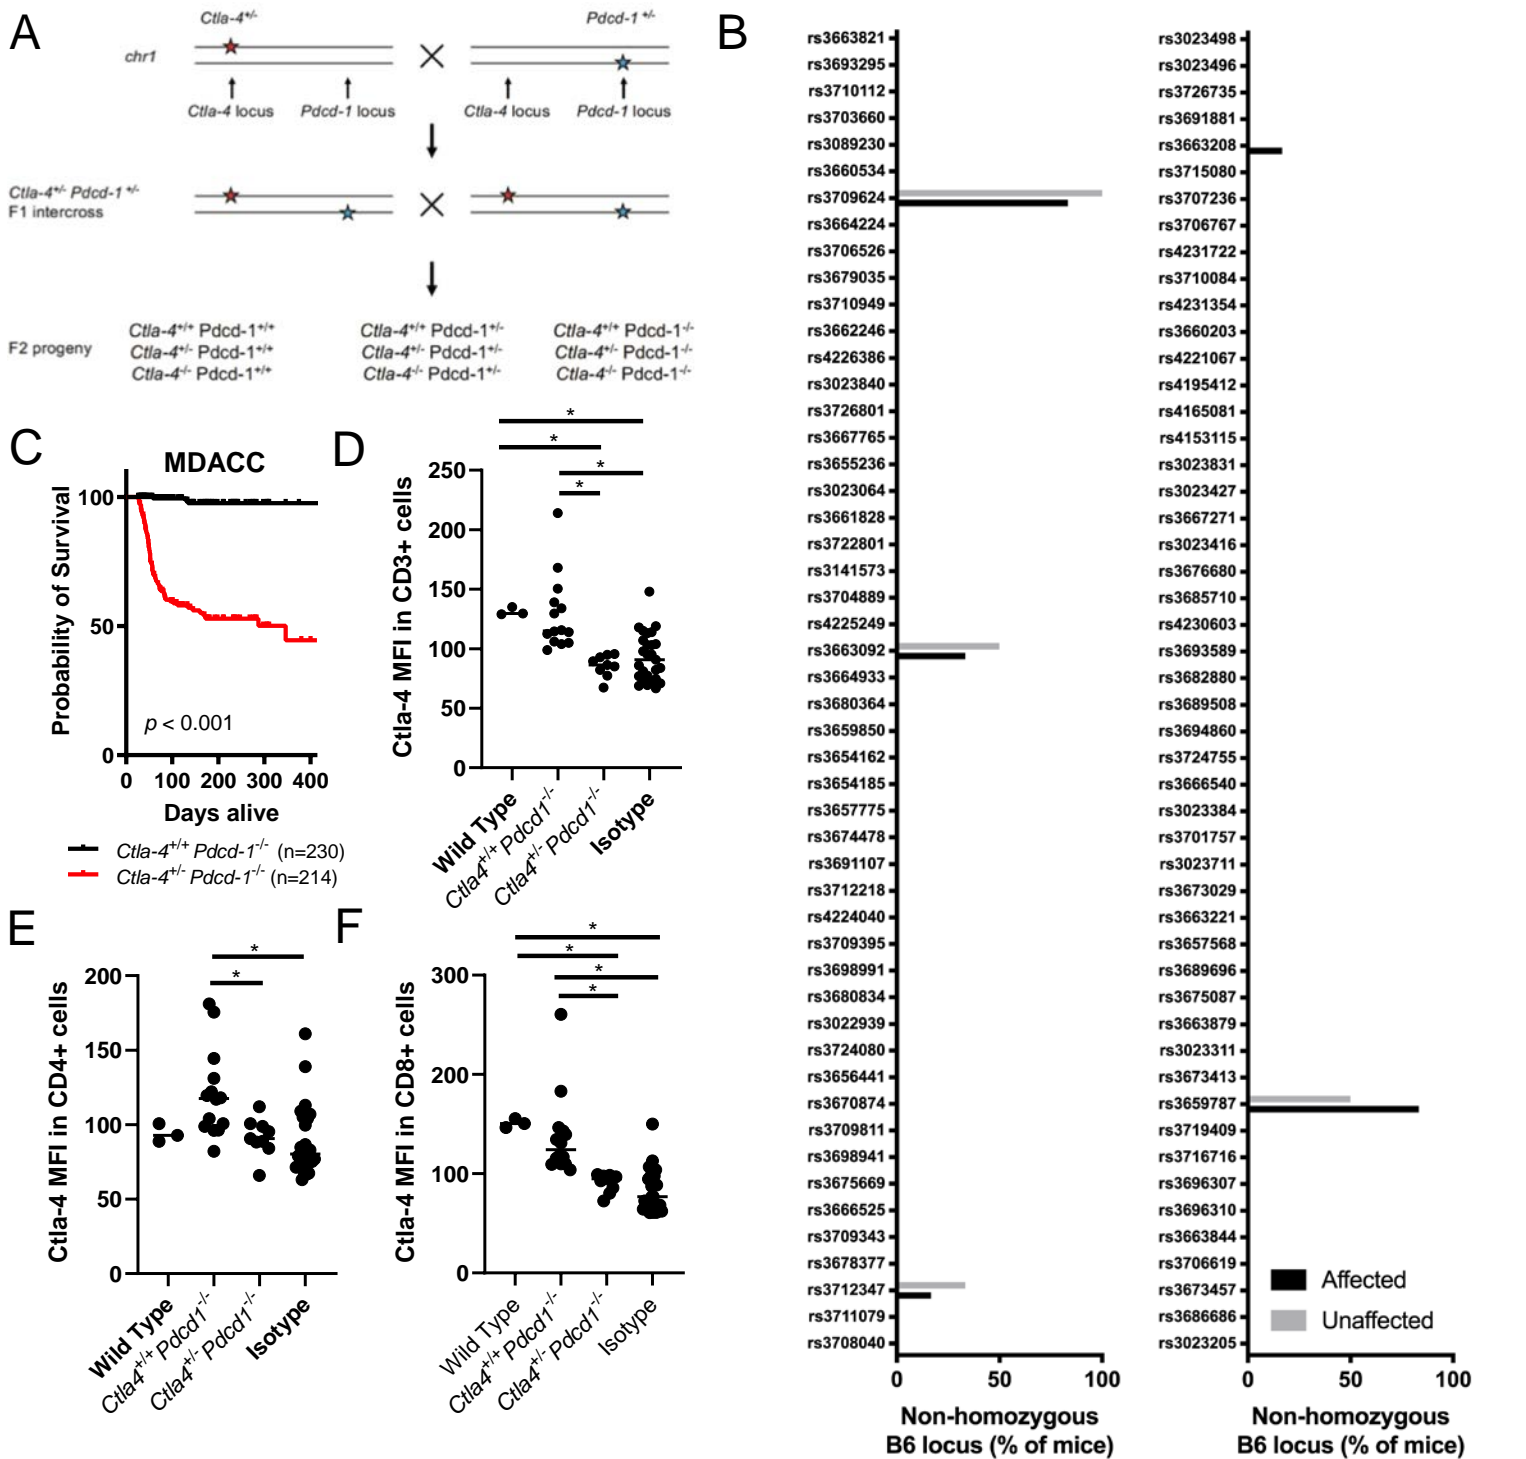

**Supplemental Figure 2: Generation and characterization transgenic mice with compound loss of function alleles of *Ctla4* and *Pdcd1*.**

**A)** Schematic of the breeding scheme to generate all potential combinations of *Ctla4* and *Pdcd1* loss of function mutant alleles.

**B)** 100-SNP panel assessing strain background of *Ctla4*<sup>+/-</sup> *Pdcd1*<sup>-/-</sup> mice displaying clinical signs (affected) and not displaying clinical signs (unaffected). All tested mice harbored 96.5-100% C57BL6/J alleles. Non-homozygous B6 locus is defined as either heterozygous for B6/129 or homozygous for 129 alleles.

**C)** Kaplan-Meier survival curve of *Ctla4*<sup>+/-</sup> *Pdcd1*<sup>-/-</sup> (n = 350) and littermate *Ctla4*<sup>+/-</sup> *Pdcd1*<sup>-/-</sup> (n = 400) mice derived from a *Ctla4*<sup>+/-</sup> *Pdcd1*<sup>-/-</sup> by *Ctla4*<sup>+/-</sup> *Pdcd1*<sup>-/-</sup> breeding cross performed at the MD Anderson Cancer Center (MDACC) vivarium. P-value represents the result of the Mantel-Cox Log-rank test.

**D-F)** Total CTLA-4 protein levels in in vitro stimulated T cells from *Ctla4*<sup>+/-</sup> *Pdcd1*<sup>-/-</sup> and *Ctla4*<sup>+/-</sup> *Pdcd1*<sup>-/-</sup> mice lymph nodes. Mean fluorescence intensity (MFI) is displayed on a per mouse basis with mean and standard deviation. Isotype control stained samples for all groups are displayed as well as expression in wild-type C57BL6/J mice. \*, p < 0.05 ANOVA with Tukey's multiple testing correction.

# Supplemental Figure 3

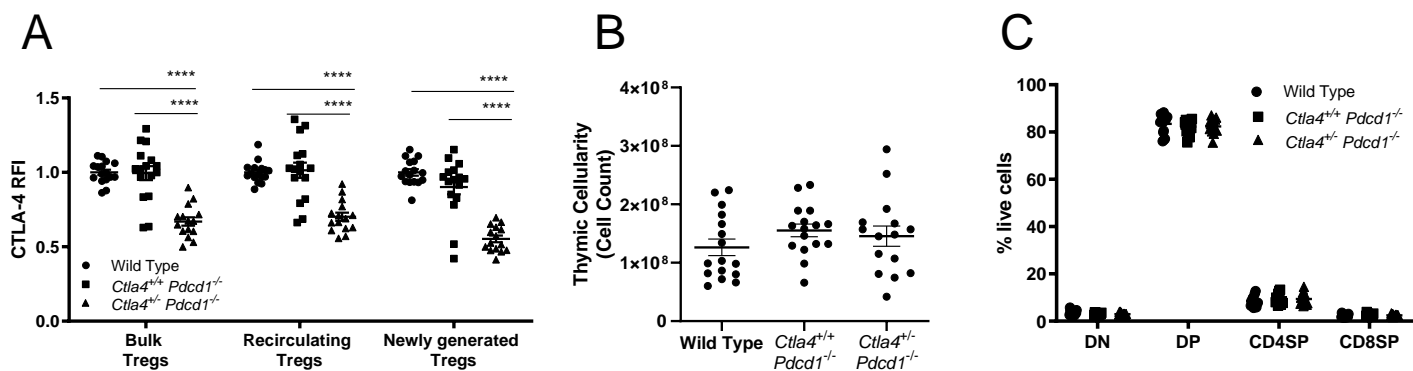

**Supplemental Figure 3. Characterization of CTLA-4 expression and thymic development in *Ctla4*<sup>+/-</sup> *Pcdcd1*<sup>-/-</sup> mice.**

**A)** Total CTLA-4 protein levels of thymus-derived T regulatory cells from wild-type C57BL6/J, *Ctla4*<sup>+/-</sup> *Pcdcd1*<sup>-/-</sup> and *Ctla4*<sup>+/-</sup> *Pcdcd1*<sup>-/-</sup> mice assessed by flow cytometry. Relative fluorescence intensity (RFI) is displayed on a per mouse basis with mean and standard deviation. Treg were identified as CD25<sup>+</sup> FoxP3<sup>+</sup> cells with newly generated and recirculating Treg cells defined as CD24<sup>high</sup> Cd44<sup>low</sup> and CD24<sup>low</sup> CD44<sup>high</sup>, respectively. RFI Expression levels are calculated as relative fluorescent intensities, normalized to CTLA-4 expression in C57BL6/J mice. \*, p < 0.05 ANOVA with Tukey's multiple testing correction.

**B)** Thymic cellularity of wild-type C57BL6/J, *Ctla4*<sup>+/-</sup> *Pcdcd1*<sup>-/-</sup> and *Ctla4*<sup>+/-</sup> *Pcdcd1*<sup>-/-</sup> mice assessed by flow cytometry.

**C)** Thymic composition of wild-type C57BL6/J, *Ctla4*<sup>+/-</sup> *Pcdcd1*<sup>-/-</sup> and *Ctla4*<sup>+/-</sup> *Pcdcd1*<sup>-/-</sup> mice assessed by flow cytometry. CD4<sup>+</sup> CD8<sup>+</sup> double negative (DN), CD4<sup>+</sup> CD8<sup>+</sup> double positive (DP), CD4<sup>+</sup> single positive (CD4SP), and CD8<sup>+</sup> single positive (CD8SP)

# Supplemental Figure 4

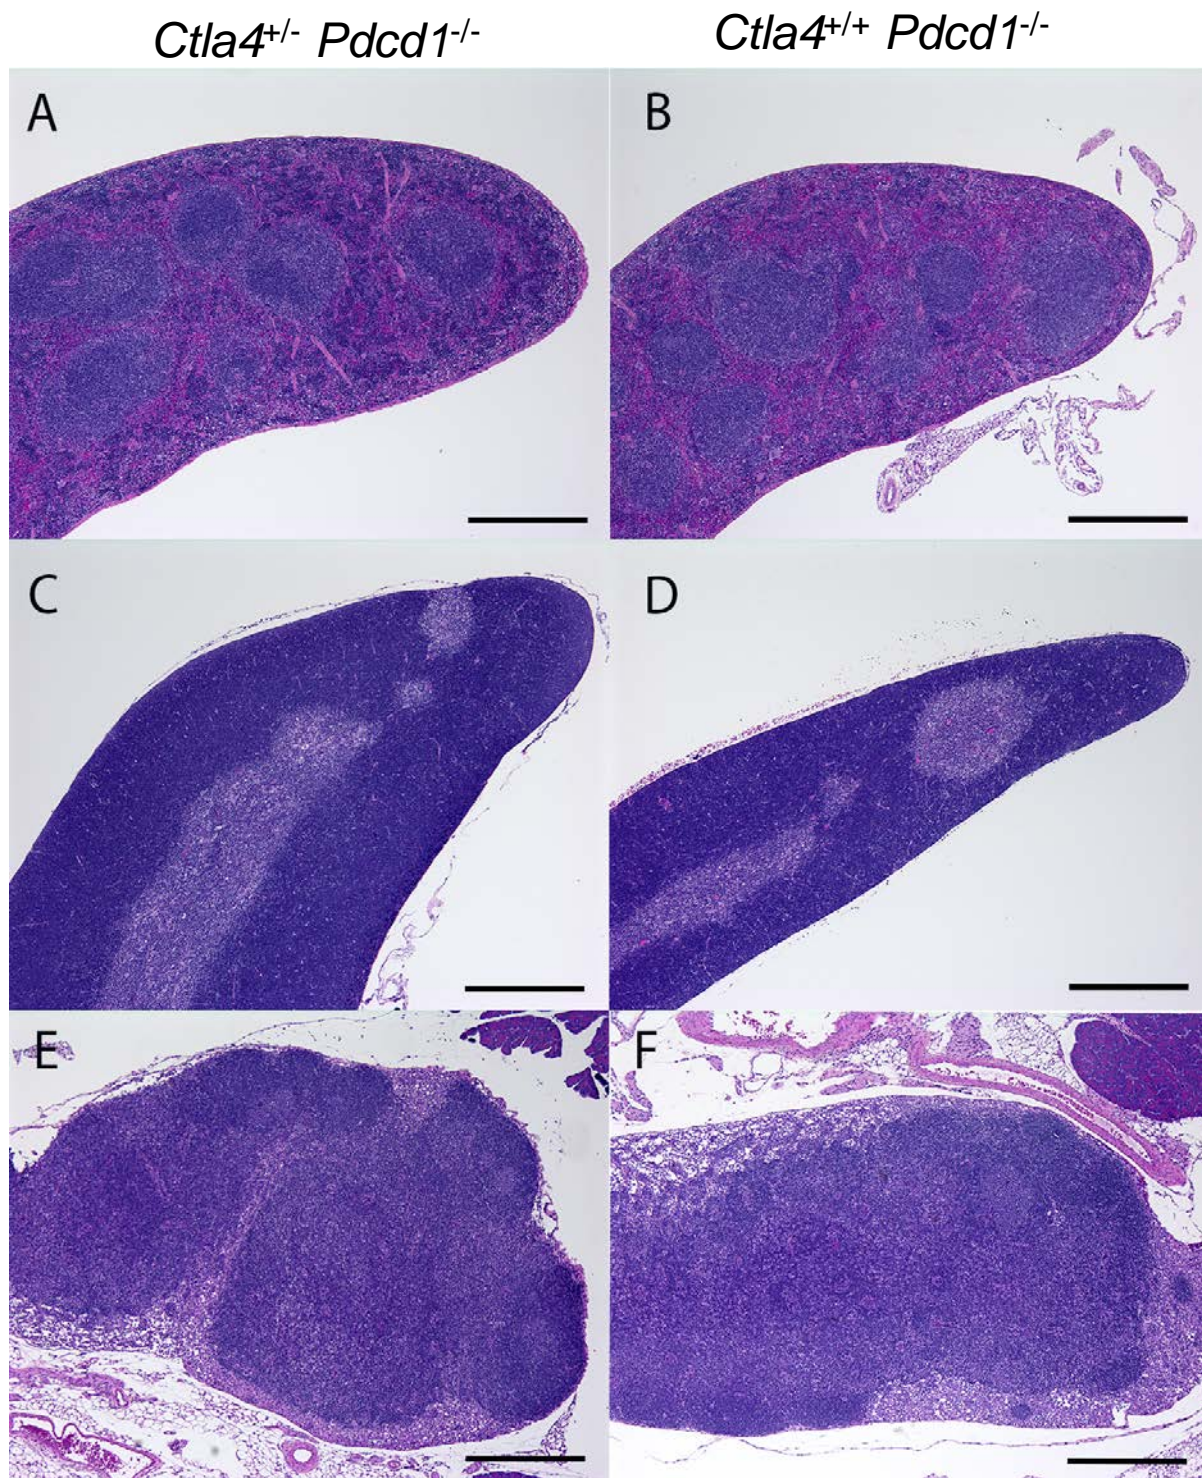

**Supplemental Figure 4: Absence of lymphoproliferative or abnormal morphology in lymphoid tissues of *Ctla4*<sup>+/-</sup> *Pdc1*<sup>-/-</sup> mice.**

**A-B)** Representative photomicrograph images of H&E stained spleen tissue from 28-day old *Ctla4*<sup>+/-</sup> *Pdc1*<sup>-/-</sup> and *Ctla4*<sup>+/+</sup> *Pdc1*<sup>-/-</sup> mice. Bar = 500 microns.

**C-D)** Representative photomicrograph images of H&E stained thymus tissue from 28-day old *Ctla4*<sup>+/-</sup> *Pdc1*<sup>-/-</sup> and *Ctla4*<sup>+/+</sup> *Pdc1*<sup>-/-</sup> mice. Bar = 500 microns.

**E-F)** Representative photomicrograph images of H&E stained mesenteric lymph node tissue from 28-day old *Ctla4*<sup>+/-</sup> *Pdc1*<sup>-/-</sup> and *Ctla4*<sup>+/+</sup> *Pdc1*<sup>-/-</sup> mice. Bar = 500 microns.

# Supplemental Figure 5

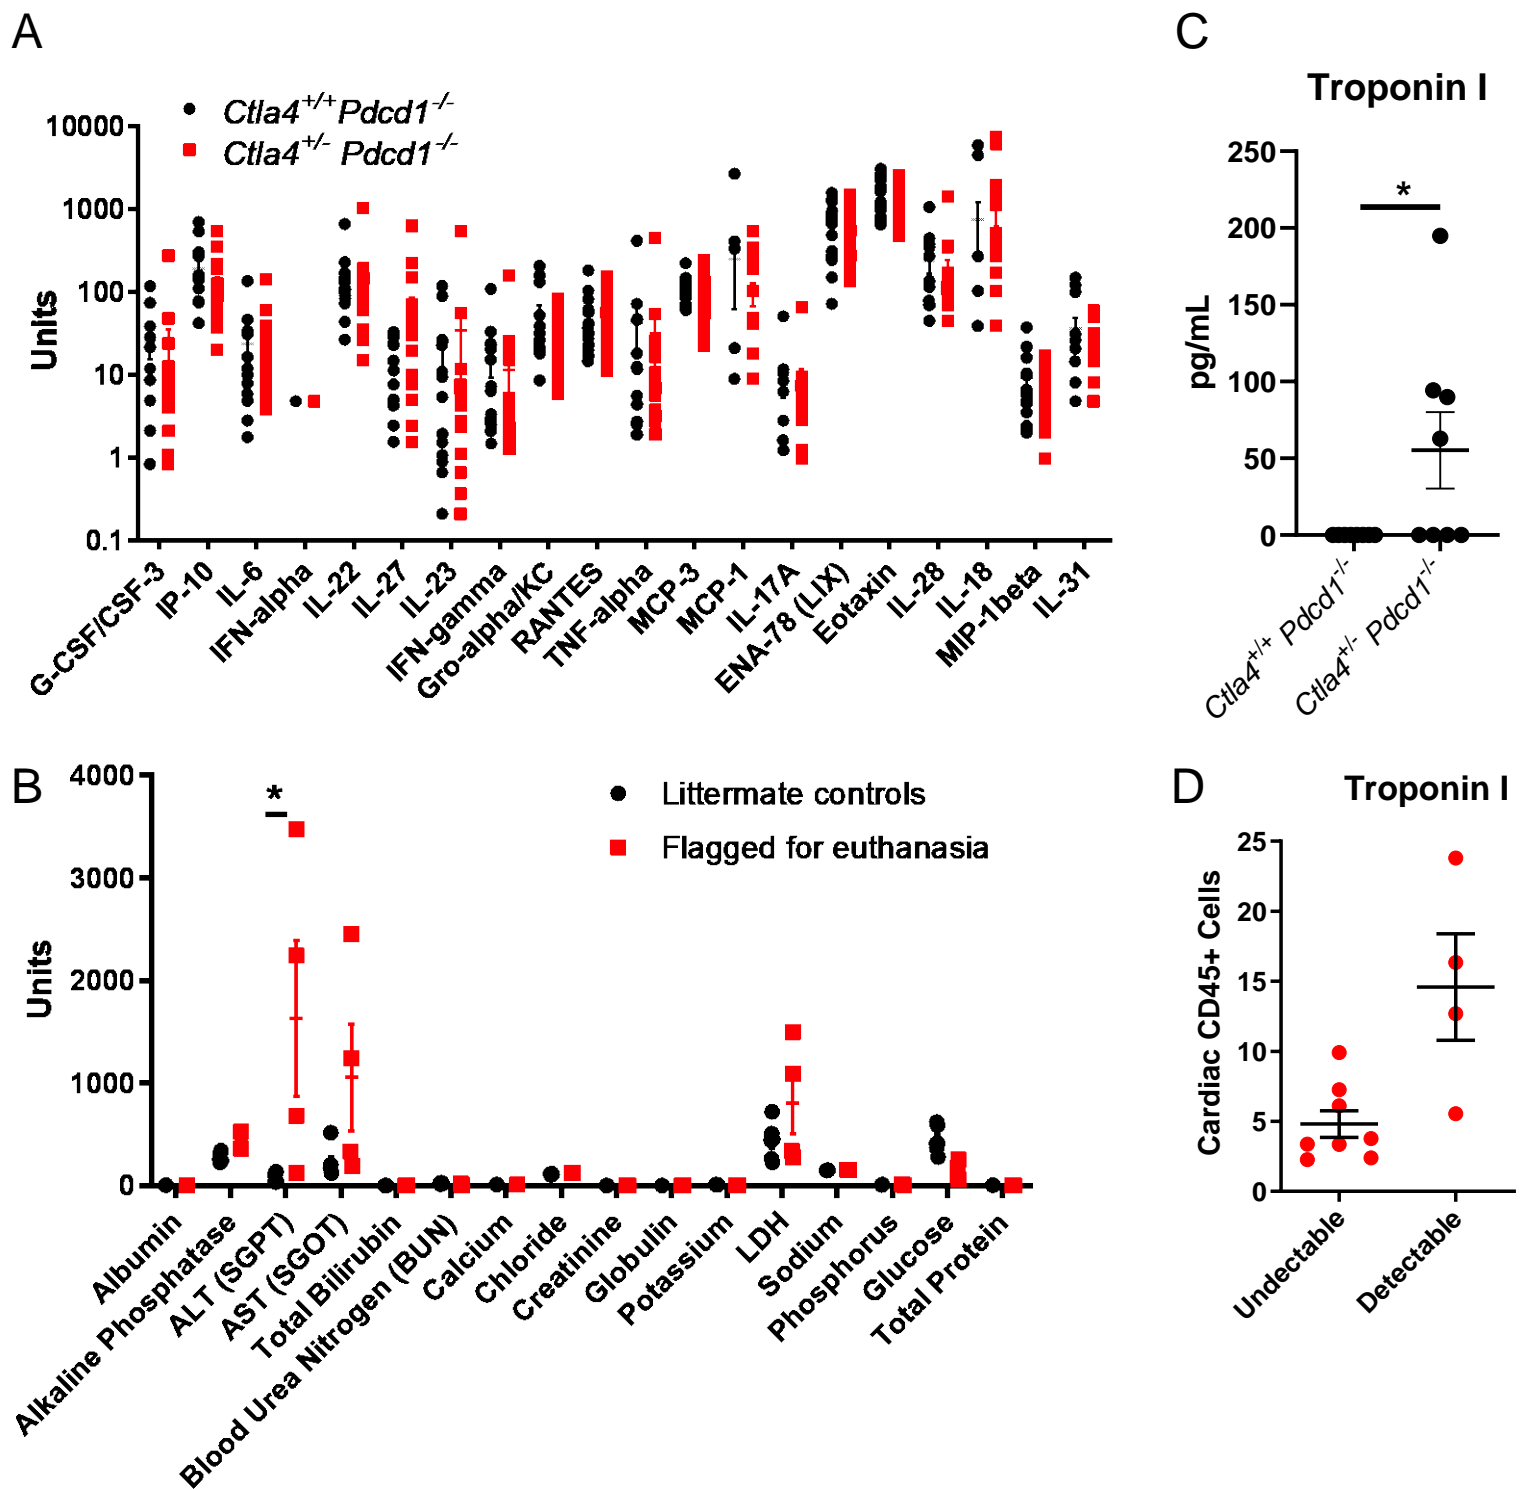

**Supplemental Figure 5. Characterization of serum properties in *Ctla4*<sup>+/-</sup> *Pcd1*<sup>-/-</sup> mice.**

**A)** Serum levels of cytokine in *Ctla4*<sup>+/-</sup> *Pcd1*<sup>-/-</sup> and *Ctla4*<sup>+/+</sup> *Pcd1*<sup>-/-</sup> mice. Mice analyzed were 29-362 days old. This combined two cohorts, including a young cohort with *Ctla4*<sup>+/-</sup> *Pcd1*<sup>-/-</sup> mice that displayed clinical signs as well as aged mice. All comparisons included aged matched littermate controls.

**B)** Serum chemistry of *Ctla4*<sup>+/-</sup> *Pcd1*<sup>-/-</sup> mice displaying clinical signs requiring euthanasia and control littermate mice. Mice analyzed were 40-50 days old.

**C)** Serum troponin levels in *Ctla4*<sup>+/-</sup> *Pcd1*<sup>-/-</sup> and *Ctla4*<sup>+/+</sup> *Pcd1*<sup>-/-</sup> mice. Mice analyzed were 40-50 days old. \*, P<0.05 T-test with multiple testing correction.

**D)** CD45<sup>+</sup> heart infiltration in *Ctla4*<sup>+/-</sup> *Pcd1*<sup>-/-</sup> mice where serum troponin levels were detectable via ELISA vs. those where they were not.

# Supplemental Figure 6

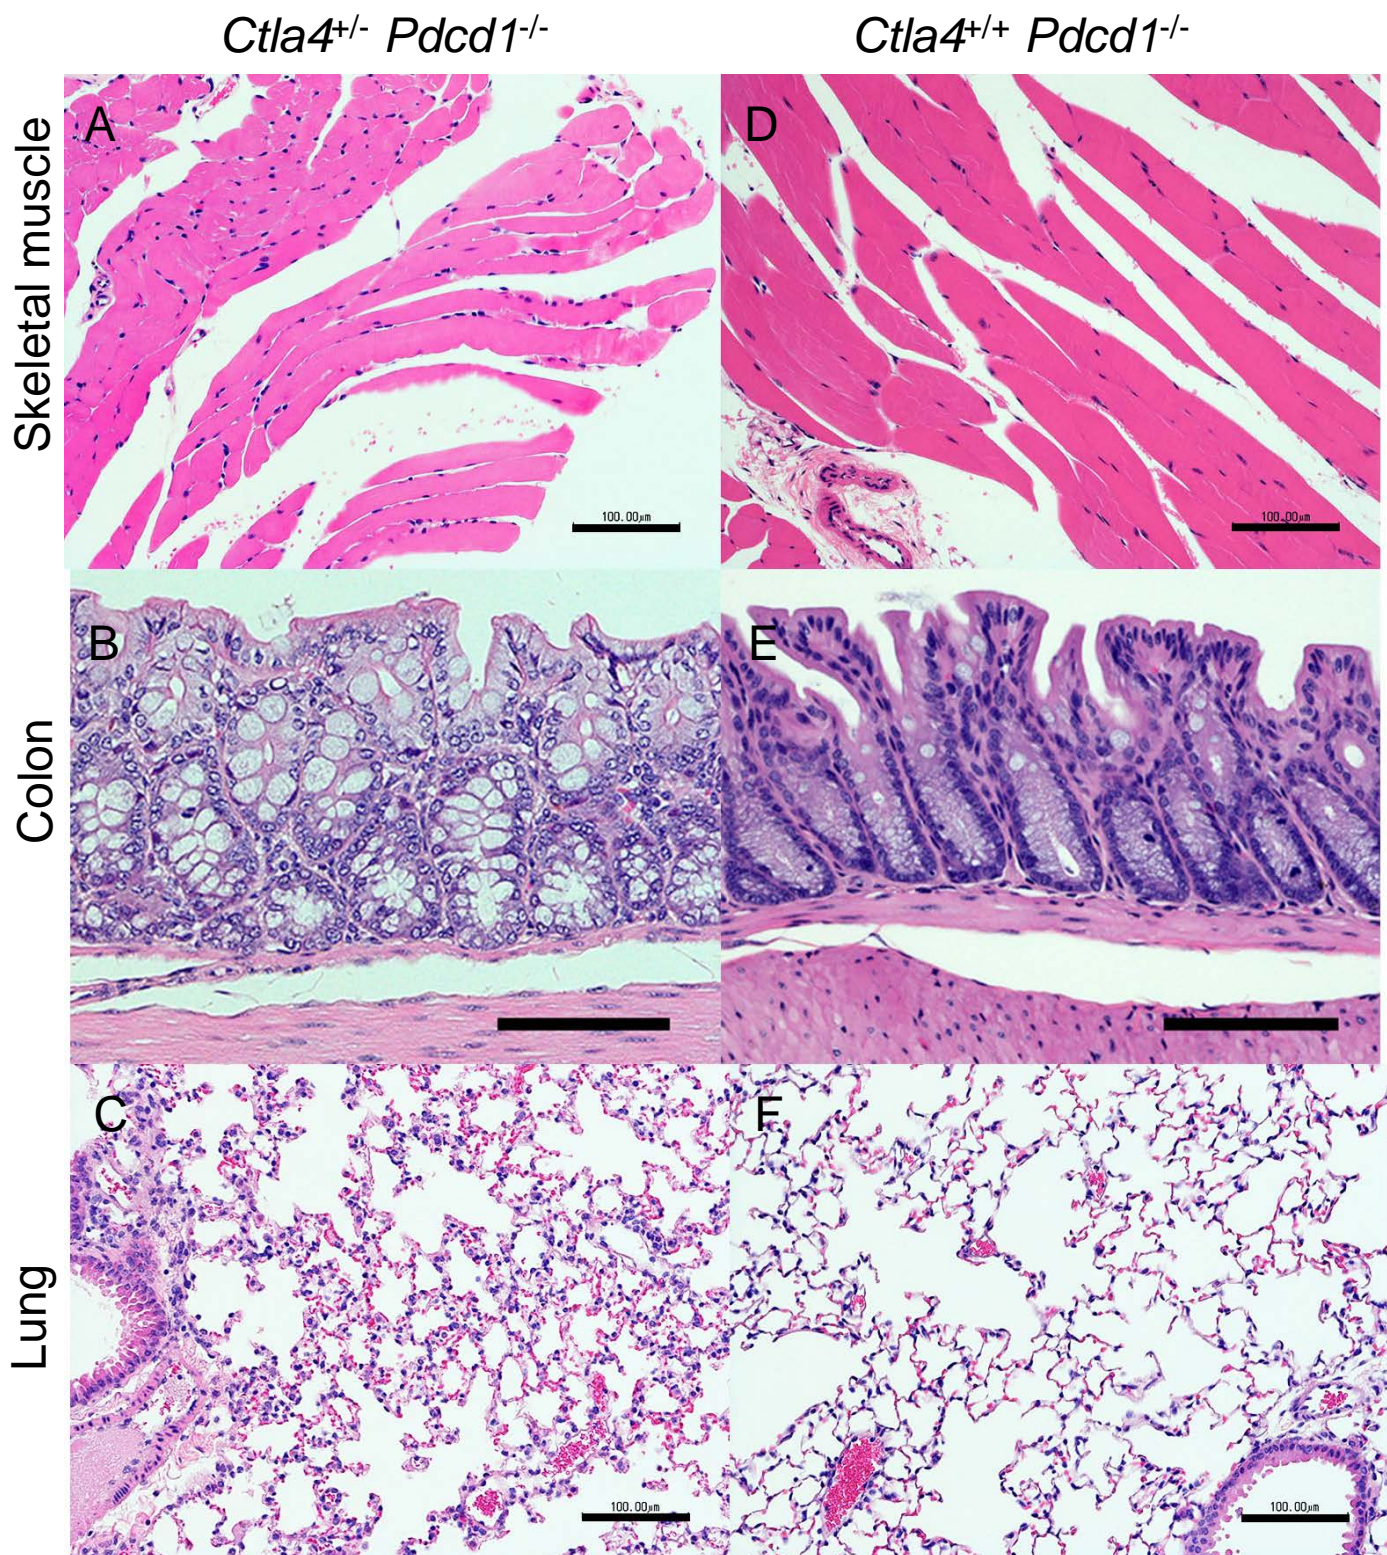

**Supplemental Figure 6: Histopathology of skeletal muscle, colon and lung tissue in *Ctl4<sup>+/-</sup> Pdcd1<sup>-/-</sup>* mice.** Representative photomicrographs of skeletal muscle, colon, and lung from littermate 99-day-old, male heterozygous (A, B, C) and wild-type (D, E, F) *Ctl4-4* mice. Note the increased cellularity of the interstitium in the lung of the heterozygous mouse. Cellular infiltrates are not increased in skeletal muscle or colon, compared with the wild-type mouse (difference in degree of mucus distension of colonic goblet cells in the heterozygote is likely due to regional location of sample collection or secondary effects of *Ctl4-4* deficiency.) Hematoxylin and eosin. Bar = 100 microns.

# Supplemental Figure 7

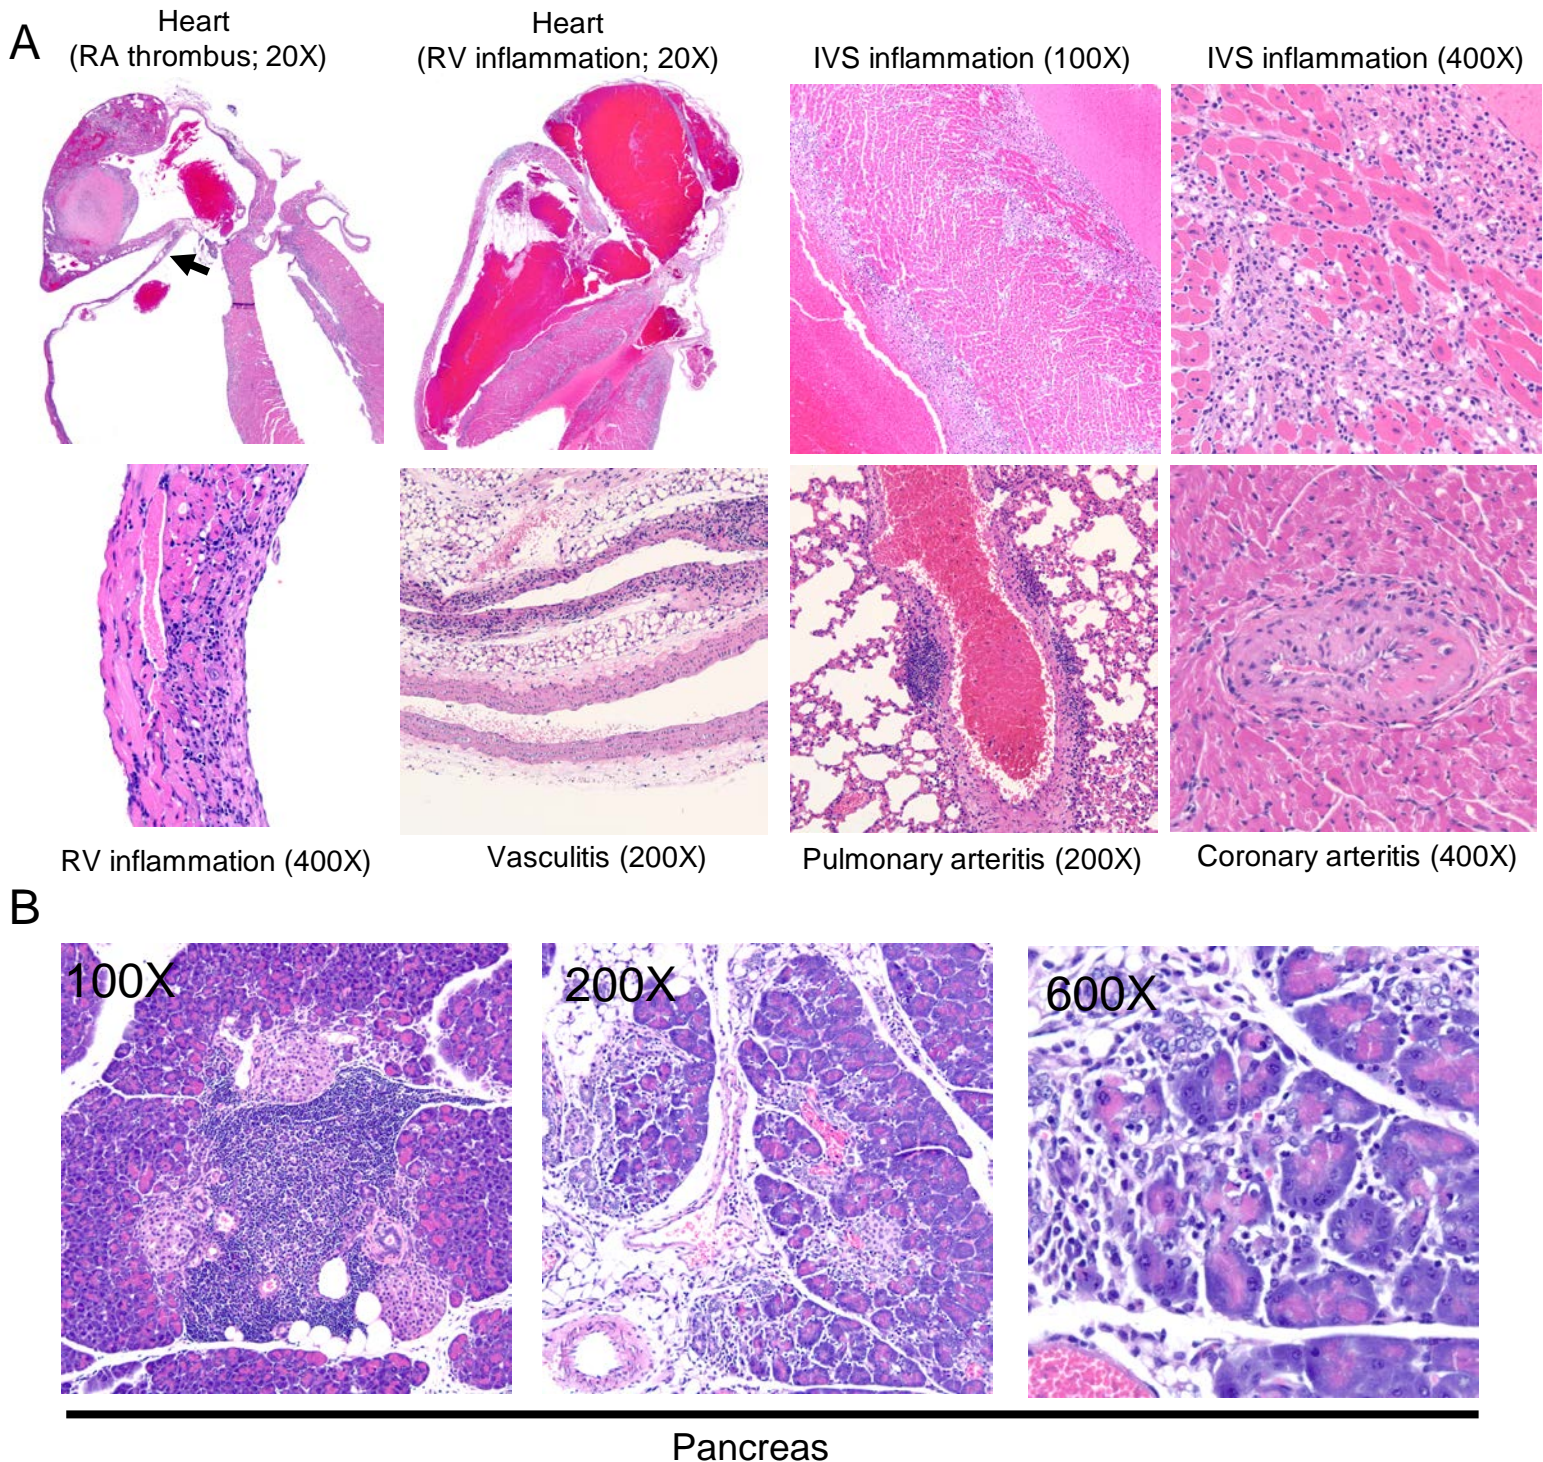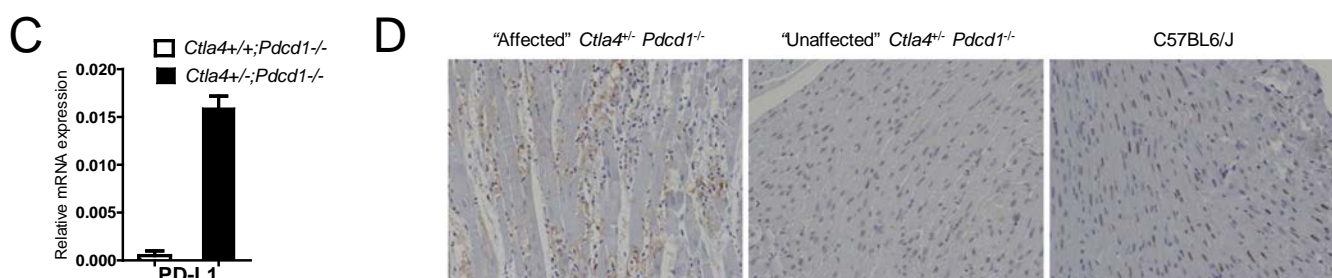

**Supplemental Figure 7. Cardiovascular and pancreatic histopathology in *Ctla4<sup>+/+</sup> Pdc1<sup>-/-</sup>* mice.**

- A)** Photomicrograph images of H&E stained heart tissue from *Ctla4<sup>+/+</sup> Pdc1<sup>-/-</sup>* mice.  
**B)** Photomicrograph images of H&E stained pancreatic tissue from *Ctla4<sup>+/+</sup> Pdc1<sup>-/-</sup>* mice  
**C)** PD-L1 mRNA expression in cardiac tissue assessed by qPCR.  
**D)** Example of PD-L1 expression assessed by immunohistochemistry in cardiac tissue in "affected" *Ctla4<sup>+/+</sup> Pdc1<sup>-/-</sup>* mice (displaying clinical signs), "unaffected" *Ctla4<sup>+/+</sup> Pdc1<sup>-/-</sup>* mice, and C57BL6/J wild-type mice for reference.

# Supplemental Figure 8

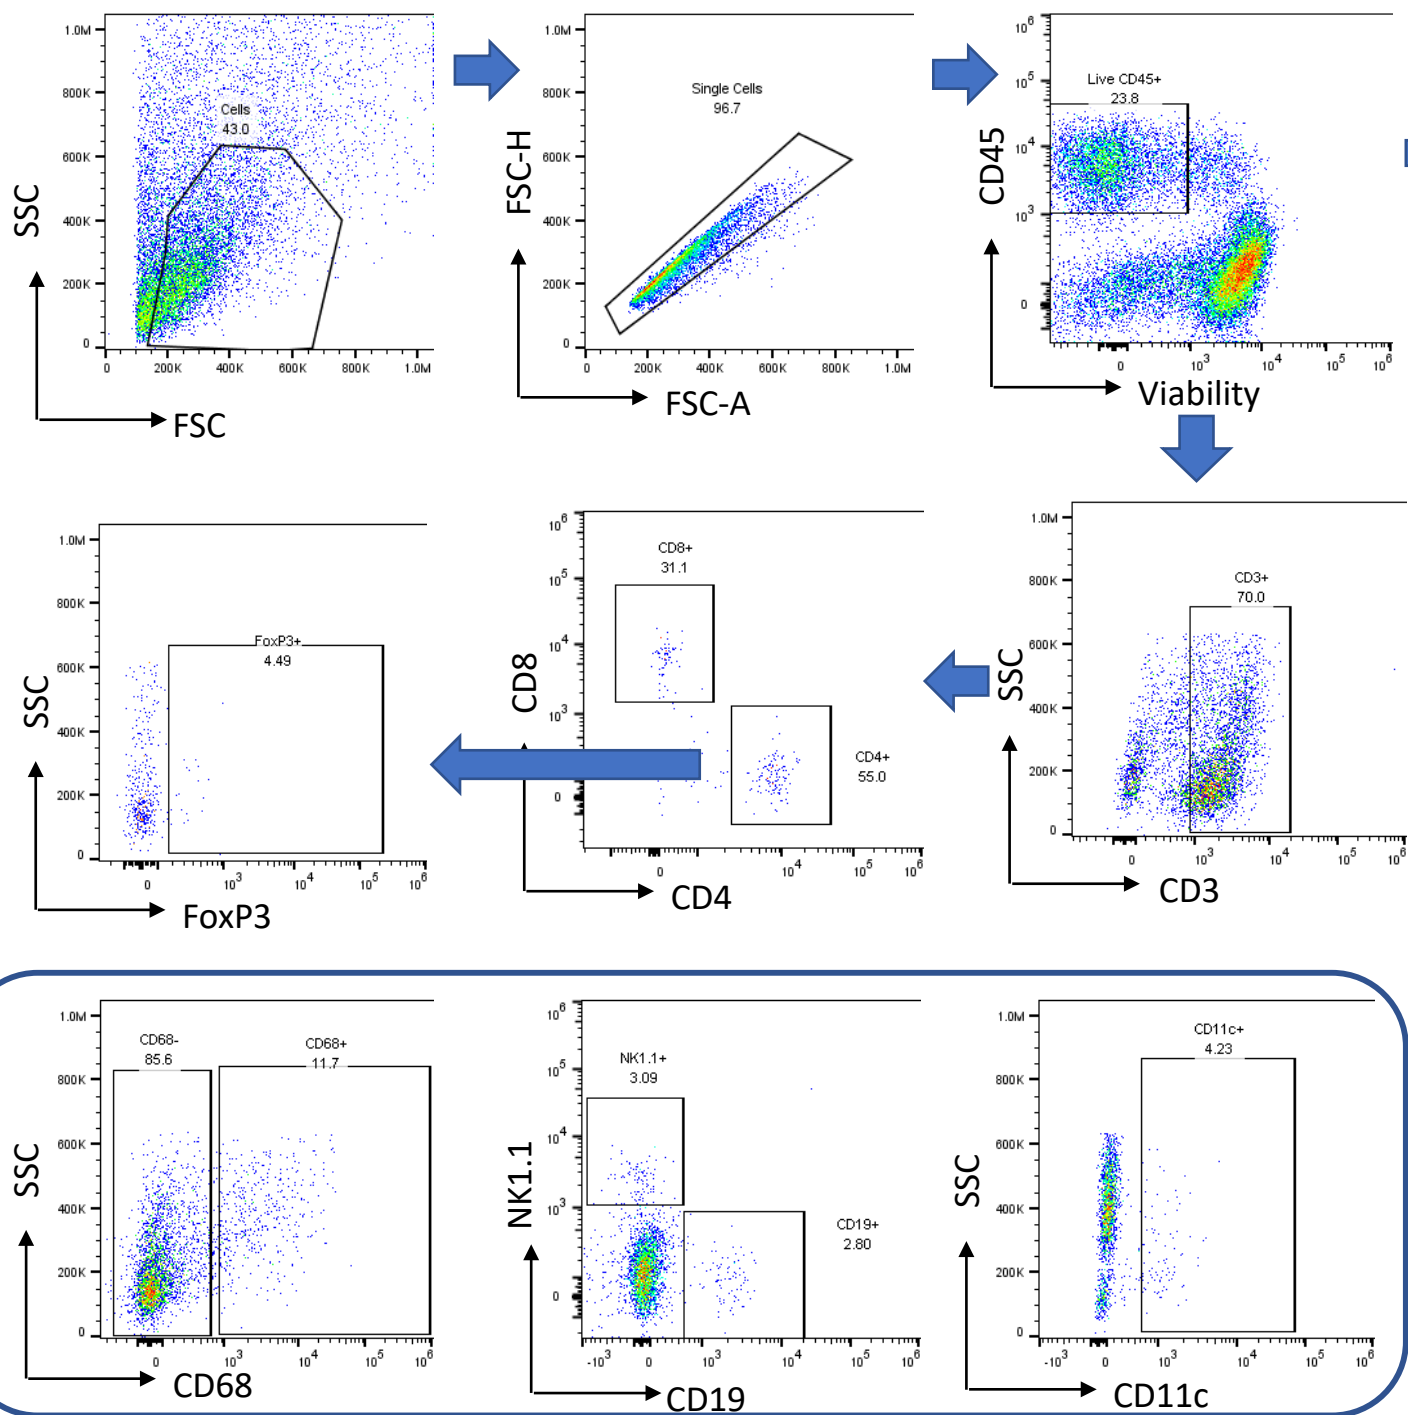

**Supplemental Figure 8: Gating strategy/example for characterization of cardiac immune infiltrates *Ctla4<sup>+/-</sup> Pdcd1<sup>-/-</sup>* mice.**

Dissociated cardiac tissue from mice were gated for singlet status, viability, and CD45 positivity, followed by enumeration of the identified populations.

# Supplemental Figure 9

A

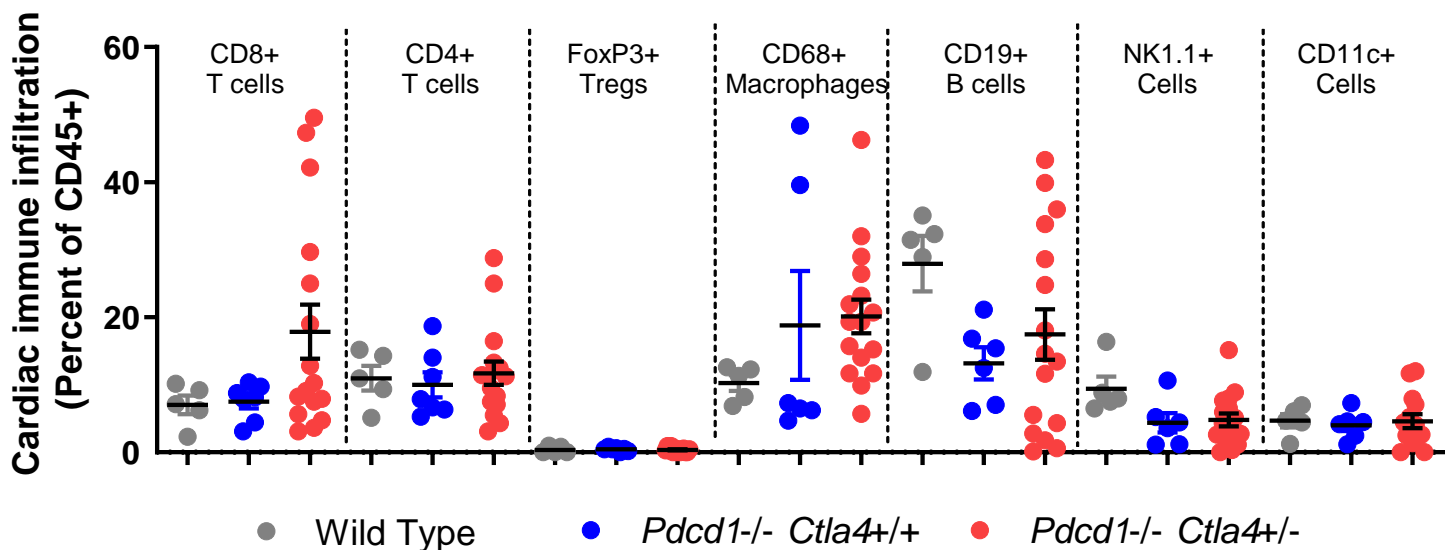

B

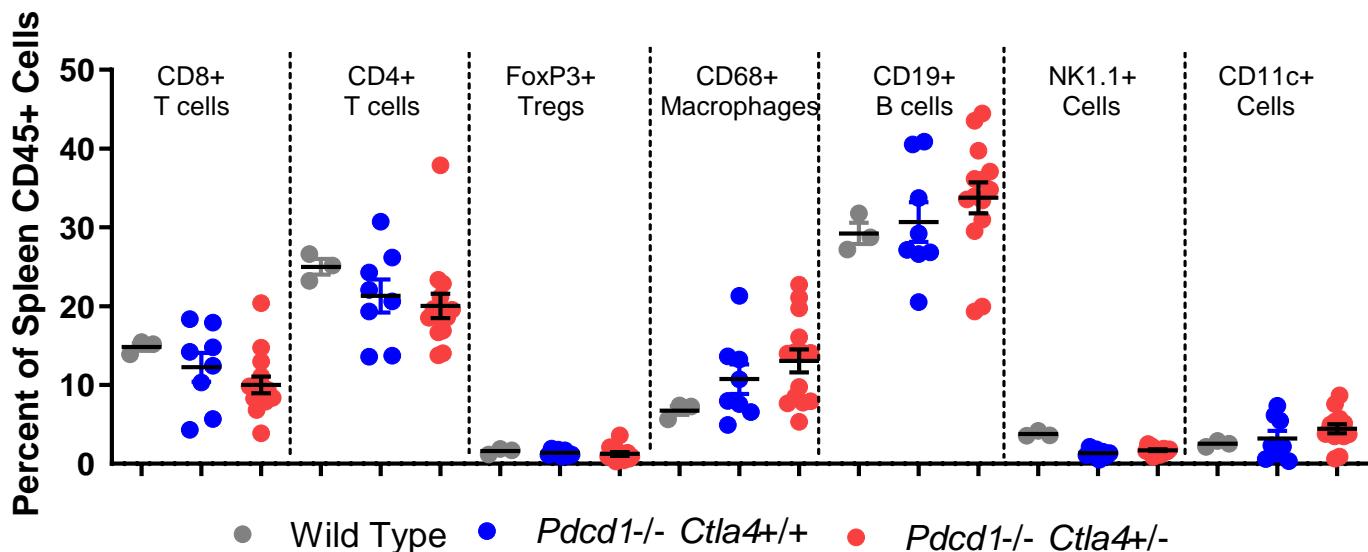

C

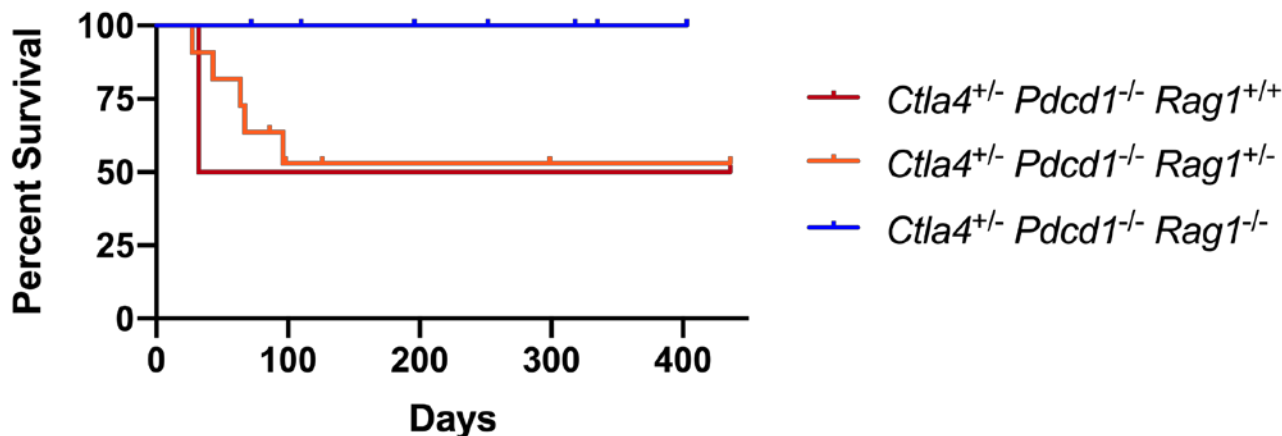

**Supplemental Figure 9: Characterization of splenic populations among genotypes and survival analysis of female *Ctla4*<sup>+/-</sup> *Pdc1*<sup>-/-</sup> *Rag1*<sup>-/-</sup> mice.**

- A) Flow cytometry analysis of cardiac immune populations expressed as a percent of total CD45+ cells (No statistically significant different between groups by ANOVA)
- B) Flow cytometry analysis of immune populations in murine spleens, matched from Fig. 2E No statistically significant different between groups by ANOVA)
- C) Kaplan-Meier survival curve of female *Ctla4*<sup>+/-</sup> *Pdc1*<sup>-/-</sup> *Rag1*<sup>-/-</sup> (n=7) and littermate female *Ctla4*<sup>+/-</sup> *Pdc1*<sup>-/-</sup> *RAG1* competent mice (n=11 and 2 for *Rag1*<sup>+/-</sup> and *Rag1*<sup>+/+</sup>, respectively).

# Supplemental Figure 10

## Patient 1

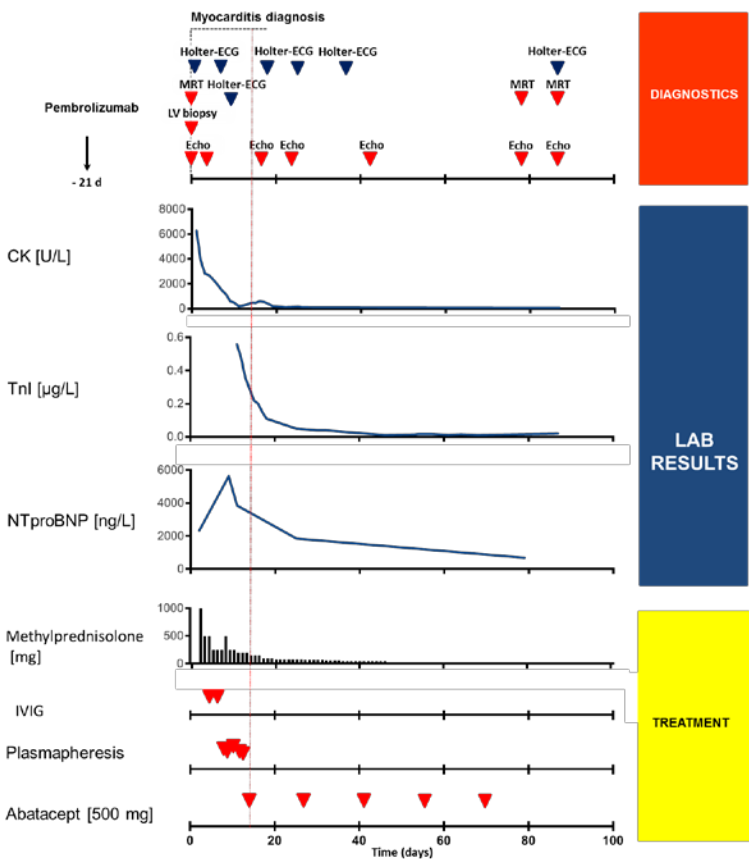

## Patient 2

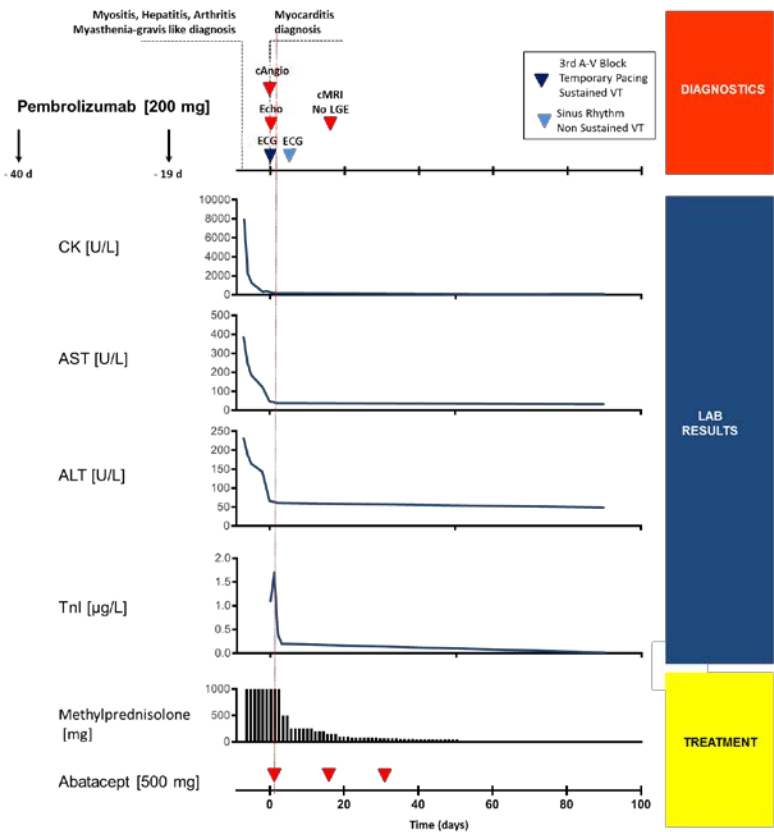

Supplemental Figure 10: Clinical course, diagnostic labs, and therapy in 2 immune-related myocarditis patients treated with abatacept
